# Supplementary material for: A green strategy for the preparation of a honeycomb-like silicon composite with enhanced lithium storage properties
Source: Royal Society of Chemistry journal article supplement (doi:10.1039/d0nr02769c), 2020-01-01
Supplement: d0nr02769c1.pdf [file d0nr02769c1.pdf]

## **A Green Strategy for Preparation of Honeycomb-like Silicon Composite with Enhanced Lithium Storage Properties**

Runsheng Gao <sup>a,b</sup>, Jie Tang <sup>a,b,\*</sup>, Xiaoliang Yu <sup>a</sup>, Kun Zhang <sup>a</sup>, Kiyoshi Ozawa <sup>a</sup>, Lu-Chang  
Qin <sup>c</sup>

<sup>a</sup> *National Institute for Materials Science, 1-2-1 Sengen, Tsukuba, Ibaraki 305-0047, Japan*

<sup>b</sup> *University of Tsukuba, 1-1-1 Tennodai, Tsukuba, Ibaraki 305-0006, Japan*

<sup>c</sup> *Department of Physics and Astronomy, University of North Carolina at Chapel Hill, Chapel  
Hill, NC 27599-3255, USA*

Corresponding author: Jie Tang, Tang.Jie@nims.go.jp

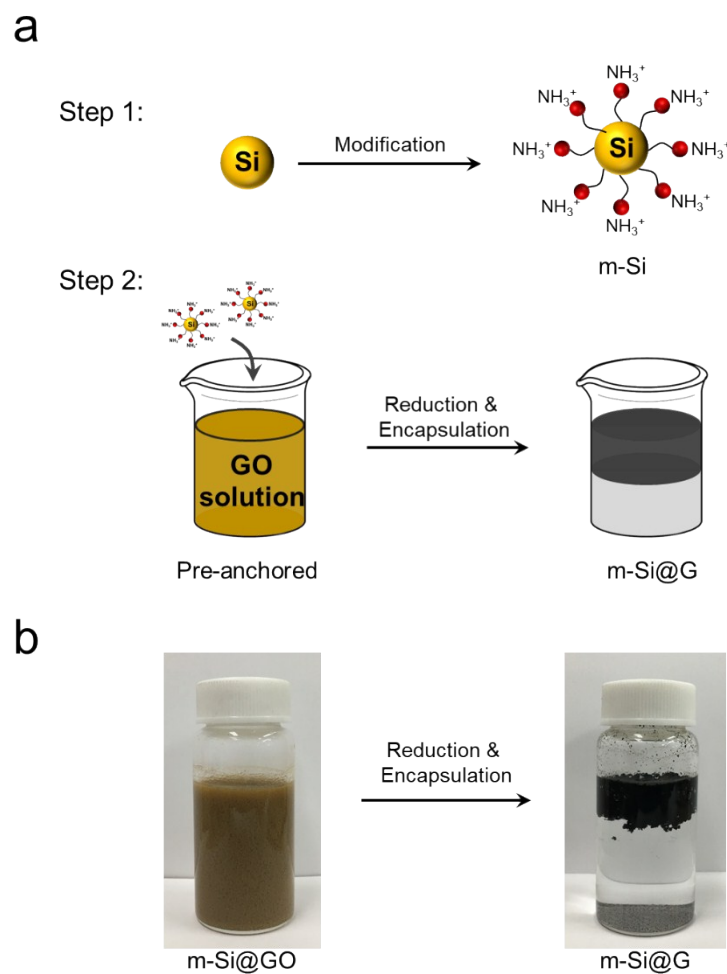

**Fig. S1.** (a) Schematic illustration of the reduction procedure by nascent hydrogen from the reaction of Al with HCl; and (b) optical images of m-Si@GO and m-Si@G.

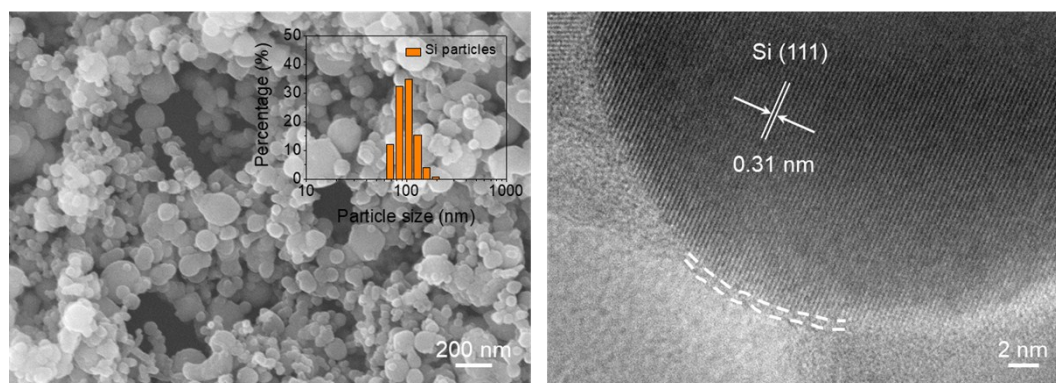

**Fig. S2.** SEM (a) and HRTEM images of naked Si.

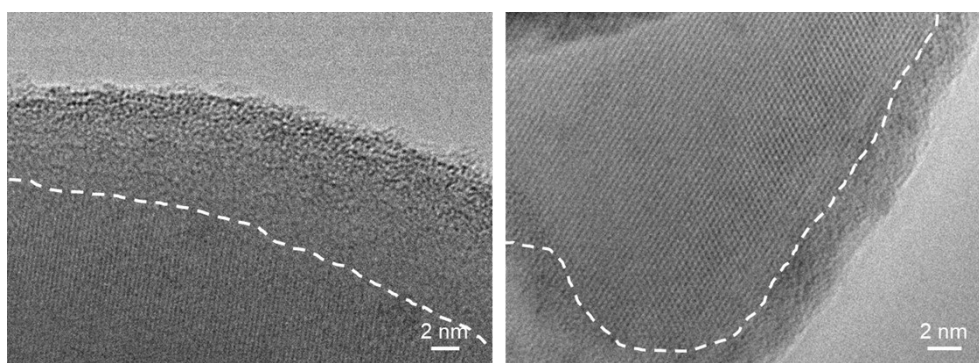

**Fig. S3.** HRTEM images of m-Si.

Due to the etching-deposition process, the thickness of the amorphous shell was much thicker than naked Si.

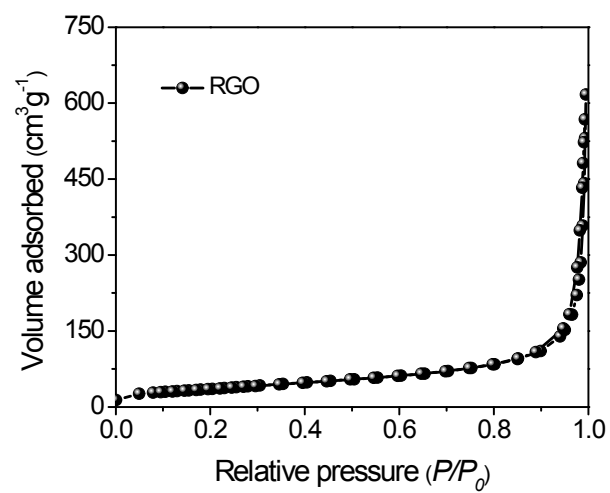

**Fig. S4.** Nitrogen adsorption/desorption isotherms of RGO.

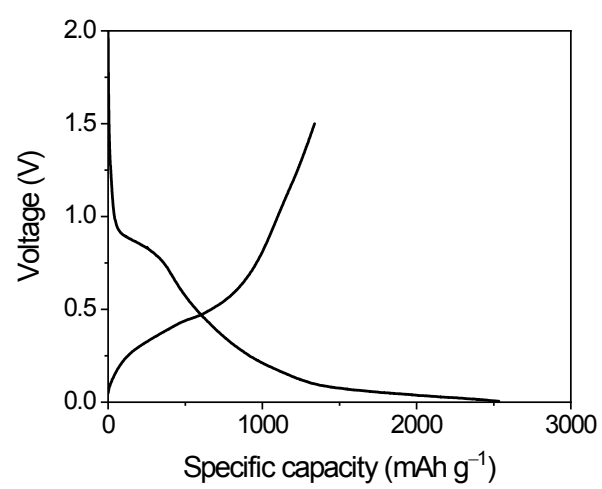

**Fig. S5.** Initial charge-discharge profile of m-Si@G.

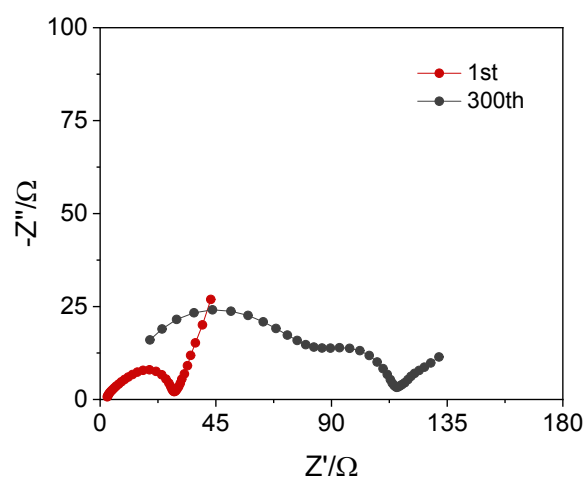

**Fig. S6.** Nyquist plots of m-Si@G at initial first cycle and after cycling.

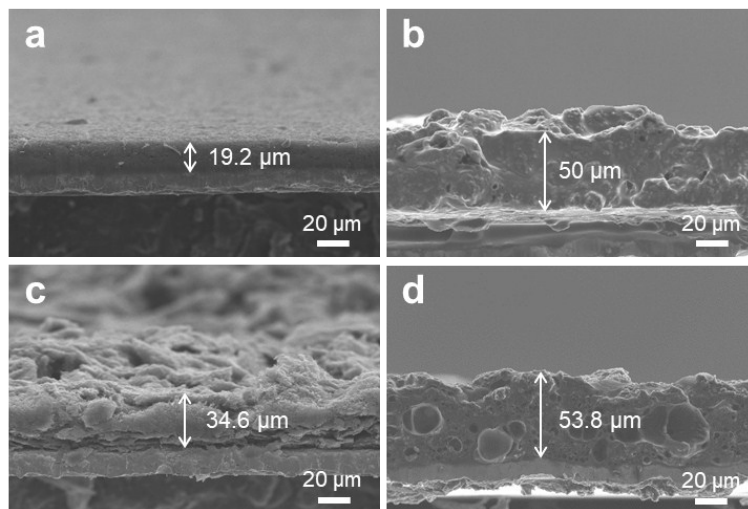

**Fig. S7.** SEM results of n-Si and m-Si@G composite electrode. (a, c) before and (b, d) after cycles, respectively.
